# Supplementary material
Source: MDPI journal article supplement (https://www.mdpi.com/2073-4344/12/9/933)
Supplement: s1 [file s1]

## Supporting information

### Photocatalytic Oxidative Desulfurization of Thiophene by Exploiting a Mesoporous $\text{V}_2\text{O}_5$ -ZnO Nanocomposite as an Effective Photocatalyst

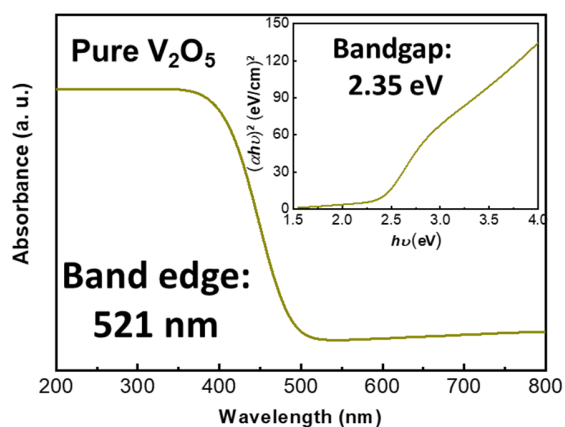

Figure S1. UV-Vis-NIR spectrum of pure  $\text{V}_2\text{O}_5$  and estimated bandgap in the inset

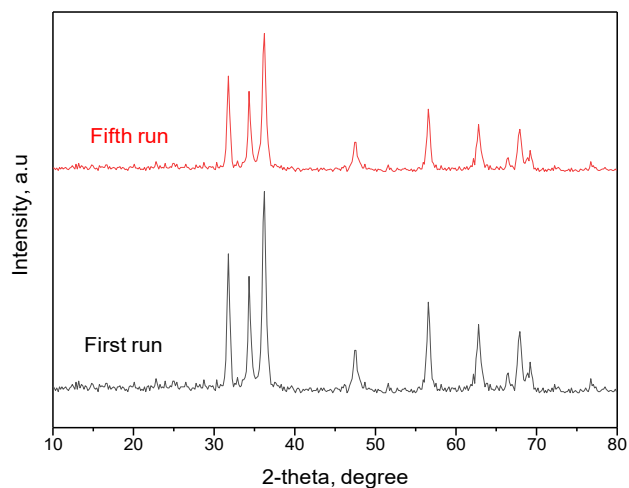

Figure S2. XRD patterns of the 3 wt %  $\text{V}_2\text{O}_5/\text{ZnO}$  photocatalyst before and after photocatalytic reactions.

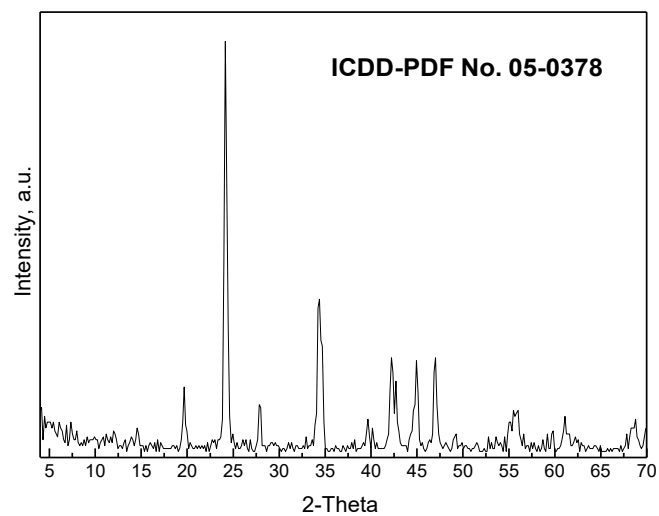

Figure S3. XRD patterns of the produced  $\text{BaCO}_3$ .

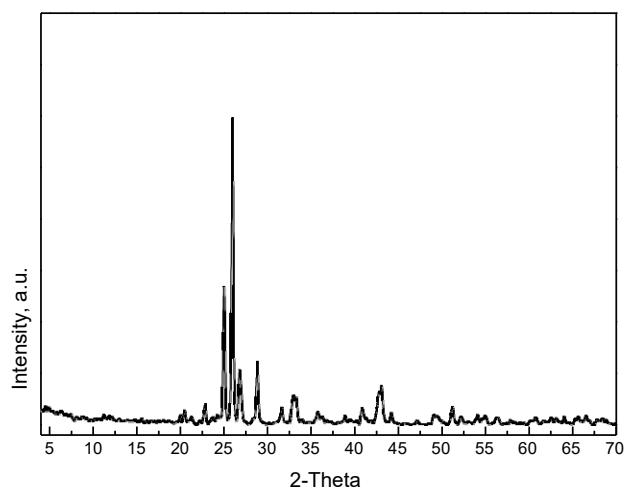

Figure S4. XRD patterns of the produced  $\text{BaSO}_4$  (ICDD-PDF No. 24-1035)

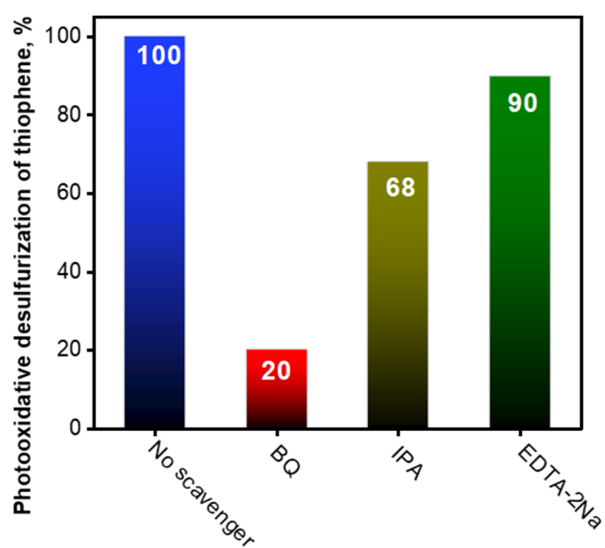

Figure S5. Photocatalytic oxidative desulfurization of thiophene over the optimized nanocomposites using different radical scavengers. The total desulfurization established without radical scavenger appeared in the first left bar. While the TPOD value was 20, 68, and 90% using 1,4-Benzoquinone (BQ, superoxide quenching), isopropanol (IPA, hydroxyl quenching), and EDTA Disodium Dihydrate (EDTA-2Na, hole scavenger), respectively
